# Supplementary material for: Identification of cyanobacterial non-coding RNAs by comparative genome analysis
Source: PubMed Central journal article supplement (PMC1242208; doi:10.1186/gb-2005-6-9-r73), 2005-08-17
Supplement: gb-2005-6-9-r73-S2.pdf [file gb-2005-6-9-r73-S2.pdf]

**Table S3. Genome versions used in this study and details of intergenic regions.** Sequences were downloaded from NCBI (<ftp://ftp.ncbi.nih.gov/genbank/genomes/Bacteria>).

| Strain   | NCBI acc. # | Version     | Length    | No of Genes | %GC  | No of IGRs >49 nt | IGR total nt (% of genome) | IGR %GC |
|----------|-------------|-------------|-----------|-------------|------|-------------------|----------------------------|---------|
| MED4     | NC_005072.1 | 19-AUG-2003 | 1,657,990 | 1,716       | 30.8 | 793               | 192,524 (10.8%)            | 24.8    |
| MIT 9313 | NC_005071.1 | 21-AUG-2003 | 2,410,873 | 2,275       | 50.7 | 1,308             | 427,459 (17.1%)            | 44.1    |
| SS120    | NC_005042.1 | 14-AUG-2003 | 1,751,080 | 1,882       | 36.4 | 989               | 192,250 (10.0%)            | 32.2    |
| WH 8102  | NC_005070.1 | 19-AUG-2003 | 2,434,428 | 2,528       | 59.4 | 1,001             | 234,454 (8.7%)             | 52.0    |

**Table S4.** Parameters for the initial local alignment of intergenic spacer regions, the clustering step and AlifoldZ.

| <b>BLASTN</b>                              | <b>parameter value</b> |
|--------------------------------------------|------------------------|
| gap open                                   | 2                      |
| gap extension                              | 2                      |
| match                                      | 2                      |
| mismatch                                   | -2                     |
| e-value cutoff                             | 1,00E-05               |
| <b>Import of HSPs</b>                      |                        |
| e-value cutoff                             | 1,00E-10               |
| <b>Unify overlapping hits</b>              |                        |
| max. reciprocal coverage                   | 85%                    |
| <b>BLASTN clustering</b>                   |                        |
| gap open                                   | 2                      |
| gap extension                              | 10                     |
| match                                      | 2                      |
| mismatch                                   | -2                     |
| query strand ('S' option)                  | 1 (=top)               |
| e-value cutoff                             | 1,00E-10               |
| <b>Unify of overlapping hits / cluster</b> |                        |
| max. reciprocal coverage                   | 10%                    |
| <b>CLUSTALW alignment</b>                  | default                |
| <b>ALIFOLDZ / RNAfold</b>                  |                        |
| temperature                                | 24°C                   |
| background size (shufflings)               | 100                    |

**Suppl. Table S5. Sequences of oligonucleotides used in this study.**

|                                         | Name     | Sequence (5' → 3')                  | Experiment                                        |
|-----------------------------------------|----------|-------------------------------------|---------------------------------------------------|
| <b>control</b>                          | PMM3822n | TCC CTG GTA TGA CTC GAA CTG C       | hybridisation mRNA of PMM3822n Med4               |
| <b>known and annotated RNA genes</b>    |          |                                     |                                                   |
|                                         | 5S       | GGC ATT GAG CTA TTT TCT CAG GGG GCT | hybridisation 5S rRNA                             |
|                                         | t_ser    | CGG AGA GGG AGG GAT TCG AAC         | hybridisation tRNA-Ser                            |
|                                         | tm5      | CGG AAT CGA ACC GCT GTC CGA         | hybridisation tmRNA (5'end):                      |
|                                         | tm3MITWH | TGA CGG GAG AAA CGA ACG ATG TTG T   | hybridisation tmRNA (3'end) in MIT9313 and WH8102 |
|                                         | tm3MS    | GCT GTT TGA CGG GAG AAA CTA ACG AT  | hybridisation tmRNA (3'end) in MED4 and SS120     |
|                                         | sc       | CCT TCC GRT CCT GAC CAG RTT T       | hybridisation scRNA                               |
| <b>predicted and verified RNA genes</b> |          |                                     |                                                   |
|                                         | y1M      | CGA TTT GGT GTG TGA GGA GTA TGG     | hybridisation Yfr1 in MED4                        |
|                                         | y1aM     | ACA GAC TTA AAA AAG CCC GAT AA      | 5'RACE reverse transcription Yfr1 MED4            |
|                                         | y1nestM  | GCG ATT TGG TGT GTG AGG AGT ATG GGG | 5'RACE PCR Yfr1 MED4                              |
|                                         | y1MIT    | CGG TGT GTG TGA GGA GTG TGT G       | hybridization Yfr1 in MIT9313                     |

|  |         |                                                   |                                                       |
|--|---------|---------------------------------------------------|-------------------------------------------------------|
|  | y1WH    | GGG GTG TGA GGA GTG TGT GG                        | hybridization Yfr1 in WH8102                          |
|  | y_genM  | CCA CTG TTT CAG TAA AAC CTC TCC TAC               | Yfr2-Yfr5 consensus primer for hybridization in MED4  |
|  | y2aM    | ATA GAG GTC TTT CCT TGG TTT AA                    | 5'RACE reverse transcription, hybridisation Yfr2 MED4 |
|  | y3aM    | ATT TCT AGA GAT CTT TAT ATA GTT TTA CT            | 5'RACE reverse transcription, hybridisation Yfr3 MED4 |
|  | y4aM    | TCT AGA GGT CTT TTT CTG GTT TT                    | 5'RACE reverse transcription, hybridisation Yfr4 MED4 |
|  | y5aM    | AAG GGG CCT AAA TTG GTT CTA                       | 5'RACE reverse transcription, hybridisation Yfr5 MED4 |
|  | y2nestM | CTA AAT CAA GTG TTT CCT TGT TTC CAC TGT TTC AG    | 5'RACE PCR Yfr2 MED4                                  |
|  | y3nestM | AAC CAA GTG TTT CCT TGT TTC CAC TGT TTC AGT AAA A | 5'RACE PCR Yfr3 MED4                                  |
|  | y4nestM | CCG AAT CAA GTG TTT CCT TGT TTC CAC TGT TTC       | 5'RACE PCR Yfr4 MED4                                  |
|  | y5nestM | CGA GTG TTT CCT TGT TTC CAC TGA TTT AAT AAA ACC   | 5'RACE PCR Yfr5 MED4                                  |
|  | y2to5M  | GTG TTT CCT TGT TTC CAC TG                        | Yfr2-Yfr5 consensus primer for hybridization in MED4  |
|  | y2S     | GTG TTT CCT AGT TTC CAC TTT T                     | hybridization Yfr2 in SS120                           |
|  | y2MIT   | GTG TTT CCT TGT TTC CAC TC                        | hybridization Yfr2 in MIT9313                         |
|  | y6MS    | GTT GAA CGT TTT RGT AGC KGT TGC TAC               | hybridisation of Yfr 6 in MED4 and SS120              |
|  | y6aM    | CTG TAT GCT GTT TTT TTG CAG C                     | 5'RACE Yfr6 reverse transcription in MED4             |

|                             |               |                                                           |                                                                                    |
|-----------------------------|---------------|-----------------------------------------------------------|------------------------------------------------------------------------------------|
|                             | y6aS          | CAT GCT TCT TTT CAA CTA CTG C                             | 5'RACE Yfr6 reverse transcription in SS120                                         |
|                             | y6nestM       | GTT TTG GAC GTA TTT TTG TCC TCT GTA<br>GAT AAG TGT CAT C  | 5'RACE PCR Yfr6 in MED4                                                            |
|                             | y6nestS       | GTT GAG TGT ACT TTT GAC CTC TGT AGG<br>TTA GTG AC         | 5'RACE PCR Yfr6 in SS120                                                           |
|                             | y7aMS         | AAG CCA GAA GAG GAG TCA A                                 | 5'RACE Yfr7 reverse transcription MED4 and SS120                                   |
|                             | y7nest1M      | GCT TTC GTT TCC AAT TAC AGG ATT GGT<br>TTA CGT CTA CAT    | 5'RACE PCR Yfr7 MED4                                                               |
|                             | y7nest2M      | CAC ATA AAG AAG AAC TTG ACC AAA GAT<br>CCA GTA TGT AAA TA | 5'RACE PCR Yfr7 MED4                                                               |
|                             | y7nest1S      | TGA TCC ATT TCC AGT TGC ATG ACT GGT<br>TTA CTT CAC        | 5'RACE PCR Yfr7 SS120                                                              |
|                             | y7nest2S      | CTT AAA AGG TCA TCA CCA ACA AAA CAG<br>TTC TCT TGC ATA    | 5'RACE PCR Yfr7 SS120                                                              |
|                             | y7MS          | CCT CAA GTC GAA AAA GAG TCA GAT CAG<br>A                  | hybridisation Yfr7 MED4 and SS120                                                  |
|                             | y7MS_2        | GTC GAA AAA GAG TCA GAT CAG AGC AC                        | hybridisation Yfr7 Med4 and SS120                                                  |
|                             | y7MIT9312     | GTC GAA AGA AAG TCA GAT CAG AGC AC                        | hybridisation Yfr7 MIT 9312                                                        |
|                             | y7MITWH       | TCG AAA GAG AGT CAG ATC AGA GCA C                         | hybridisation Yfr7 MIT9313, WH8102 and WH 7803                                     |
| <b>not yielding signals</b> |               |                                                           |                                                                                    |
|                             | y1S           | TTC TGC AGC AAT CTA AAT TTT TAA GAG<br>AAG AAA AAT AA     | hybridization <i>guaB-trxA</i> intergenic region for the presence of Yfr1 in SS120 |
|                             | ID273MSt44rev | CCC GAA ACA GTC AGA TGT G                                 | hybridisation to putative t44 RNA in MED4 and SS120                                |

|  |                |                                                          |                                                |
|--|----------------|----------------------------------------------------------|------------------------------------------------|
|  | ID273WHt44rev  | CCC GAA ACG GGC AGG                                      | hybridisation to putative t44 RNA in WH8102    |
|  | ID273MITt44rev | CCC GAA ACG GAC AGG T                                    | hybridisation to putative t44 RNA in MIT9313   |
|  | ID217Mrev      | CAG GGG TTG ATG GGT C                                    | hybridisation to candidate RNA CLID217 in MED4 |
|  | ID217Mfw       | GAC CCA TCA ACC CCT G                                    | hybridisation to candidate RNA CLID217 in MED4 |
|  | ID102Mfw       | CCA CAG AAA CTA CTA CTA TAT AAA<br>TTC ATT ATT AG        | hybridisation to candidate RNA CLID102 in MED4 |
|  | ID102Mrev      | CTA ATA ATG AAT TTA TAT AGT AGT AGT<br>AGT TTC TGT GG    | hybridisation to candidate RNA CLID102 in MED4 |
|  | ID185Mfw       | AGA TCG TAT TCA TCC ATG GTT AAG TAA<br>AGT TAA A         | hybridisation to candidate RNA CLID185 in MED4 |
|  | ID185Mrev      | TTT AAC TTT ACT TAA CCA TGG ATG AAT<br>ACG ATC T         | hybridisation to candidate RNA CLID185 in MED4 |
|  | ID66Mfw        | TAT GAG TGA ATA TGA TAA TGA ATA TCA<br>ATA GCA ATA TCA A | hybridisation to candidate RNA CLID66 in MED4  |
|  | ID66Mrev       | TTG ATA TTG CTA TTG ATA TTC ATT ATC<br>ATA TTC ACT CAT A | hybridisation to candidate RNA CLID66 in MED4  |
|  | ID194Mfw       | GTA GGA GAG GTT TTA CTG AAA CAG TGG                      | hybridisation to candidate RNA CLID194 in MED4 |
|  | ID257fw        | CCCCATACTCCTCACACAC                                      | hybridisation to candidate RNA CLID257 in MED4 |
|  | ID53Sfw        | GTA GCA ACA GCT ACT AAA ACG TTC AAC                      | hybridisation to candidate RNA CLID53 in SS120 |
|  | ID53Mfw        | GCA ACC GCT ACC AAA ACG T                                | hybridisation to candidate RNA CLID53 in MED4  |
|  | ID51Sfw        | GTC ATG CAA CTG GAA ATG GAT CAT TAC                      | hybridisation to candidate RNA CLID51 in SS120 |

|  |         |                             |                                                 |
|--|---------|-----------------------------|-------------------------------------------------|
|  | ID51Mfw | GTA ATT GGA AAC GAA AGC CCA | hybridisation to candidate<br>RNA CLID51in MED4 |
|--|---------|-----------------------------|-------------------------------------------------|
